**Title:** Transmission potential of COVID-19 in South Korea

**Authors:** Eunha Shim<sup>1</sup>, Amna Tariq<sup>2</sup>, Wongyeong Choi<sup>1</sup>, Yiseul Lee<sup>2</sup>, Gerardo Chowell<sup>2</sup>

**Affiliations**

1. Department of Mathematics, Soongsil University, 369 Sangdoro, Dongjak-Gu, Seoul, Republic of Korea 06978
2. Department of Population Health Sciences, School of Public Health, Georgia State University, Atlanta, GA, USA

**Corresponding author:** Eunha Shim

**Corresponding author email:** [alicia@ssu.ac.kr](mailto:alicia@ssu.ac.kr)

**Abstract**

Since the first identified individual of 2019 novel coronavirus (COVID-19) infection on Jan 20, 2020 in South Korea, the number of confirmed cases rapidly increased. As of Feb 26, 2020, 1,261 cases of COVID-19 including 12 deaths were confirmed in South Korea. Using the incidence data of COVID-19, we estimate the reproduction number at 1.5 (95% CI: 1.4-1.6), which indicates sustained transmission and support the implementation of social distancing measures to rapidly control the outbreak.

**Keywords:** coronavirus, COVID-19, Korea, reproduction number

**Conflict of interest:** None

**Funding statement:** For ES and WC, this work was supported by the National Research Foundation of Korea (NRF) grant funded by the Korea government (MSIT) (No. 2018R1C1B6001723).

A novel coronavirus (SARS-CoV-2) that emerged out of the city of Wuhan, China in December 2019 has already demonstrated its potential to generate explosive outbreaks in confined settings and cross borders following human mobility patterns (1). While COVID-19 frequently induces mild symptoms common to other respiratory infections, it has also exhibited an ability to generate severe disease among certain groups including older populations and individuals with underlying health issues such as cardiovascular disease and diabetes (2). Nevertheless, a clear picture of the epidemiology of this novel coronavirus is still being elucidated.

The number of cases of COVID-19 in the province of Hubei, the disease epicenter, quickly climbed following an exponential growth trend. The total number of COVID-19 cases is at 81,109 including 2718 deaths in China as of February 26, 2020 (3). Fortunately, by February 15, 2020 the daily number of new reported cases in China started to decline across the country although Hubei Province is still reporting hundreds of cases per day as of February 26<sup>th</sup>, 2020 (3). While the epidemic continues to decline in China, more than 2,900 COVID-19 cases have been reported in 37 countries outside of China including South Korea, Japan, Italy, Iran, Singapore, U.S., and Thailand (3). In particular, South Korea has quickly become the second hardest hit country with COVID-19, with steadily increasing number of cases over the last few days. Hence, it is crucial to monitor the progression of these outbreaks and assess the effects of various public health measures including the social distancing measures in real time.

The first case in South Korea was identified on January 20, 2020 followed by the detection of one or two cases on average in the subsequent days. However, the number of confirmed cases of SARS-CoV-2 infection started to increase rapidly on February 19, 2020 with a total of 1,261 confirmed COVID-19 cases including twelve deaths reported as of February 26, 2020 according to the Korea Centers for Disease Control and Prevention (KCDC) (4). The epicenter of the South Korean COVID-19 outbreak has been identified in Daegu, a city of 2.5 million people, approximately 150 miles South East of Seoul. The rapid spread of COVID-19 in South Korea has been attributed one case linked to a superspreading event that has led to at least 40 secondary cases stemming from church services in the city of Daegu (5, 6). This has led to sustained transmission chains of COVID-19, with about 52% of the cases associated with the church cluster in Daegu (7). Moreover, three other clusters have been reported including one set in Chundo Daenam hospital in Chungdo-gun, Gyeongsangbuk-do (114 cases), one Pilgrimage to Israel cluster in Gyeongsangbuk-do (31 cases) and a cluster A composed of one imported and 11 local cases in Seoul. These few clusters have become the major driving force of the infection. A total of 33 cases were imported while the three major clusters are composed of local cases as described in Supplementary Table S1.

Transmission of SARS-CoV-2 in Korea has been exacerbated by amplified transmission in confined settings including a hospital and a church in the city of Daegu. The hospital-based outbreak alone involves 114 individuals including 9 hospital staff (8), which is reminiscent of past outbreaks of SARS

and MERS (9). To respond to the mounting number of cases of COVID-19, the Korean government has raised the COVID-19 alert level to the highest (Level 4) to facilitate the implementation of social distancing measures including enhanced infection control measures in hospitals, restricting public transportation, cancelling social events, and delaying the start of school activities in order to contain the outbreak (10).

The effective reproduction number ( $R_t$ ) quantifies the time-dependent transmission potential of an infectious diseases outbreak. This key epidemiological parameter tracks the average number of secondary cases generated per case as the outbreak progresses over time. Steady values of  $R_t$  above 1 indicate sustained disease transmission, whereas values of  $R_t < 1$  do not support sustained transmission and the number of new cases is expected to follow a declining trend. In this report, using a mathematical model parameterized with cases series of the COVID-19 outbreak in Korea, we investigate the transmission potential of COVID-19 in Korea using data of local and imported cases up until February 26, 2020.

## **Methods**

### ***Data***

We obtained the daily series of confirmed cases of COVID-19 in South Korea from January 20, 2020 to February, 26, 2020 that are publicly available from the Korea Centers for Disease Control and Prevention (KCDC) (4). Our data includes the dates of reporting for all confirmed cases, the dates of symptom onsets for the first 28 reported cases, and whether the case is autochthonous (local transmission) or imported. We also summarize the case clusters comprising one or more cases according to the source of infection according to the field investigations conducted by the KCDC (4). Accordingly, four major clusters were identified.

### ***Imputing the date of onset***

To estimate the growth rate of the epidemic, it is ideal to characterize the epidemic curve according to dates of symptoms onset rather than according to dates of reporting. For the COVID-19 data in Korea, the symptom onset dates are available for only the first 28 reported cases. Moreover, all of the dates of symptoms onset are available for the imported cases. Therefore, we utilize this empirical distribution of reporting delays from the onset to diagnosis to impute the missing dates of onset for the remainder of the cases with missing data. For this purpose, we reconstruct 300 epidemic curves by dates of symptoms onset from which we derived a mean incidence curve of local case incidence and drop the last three data points from the analysis to adjust for reporting delays in our real-time analysis (11).

### ***Estimate of reproduction number from daily case incidence***

We assess the effective reproduction number,  $R_t$ , which quantifies the time dependent variations in the average number of secondary cases generated per case during the course of an outbreak due to intrinsic factors (decline in susceptible individuals) and extrinsic factors (behavior changes, cultural factors, and the implementation of public health measures) (9, 12, 13). Using the Korean incidence curves for imported and local cases, we estimate the evolution of  $R_t$  for COVID-19 in Korea. First, we characterize daily local case incidence using the generalized growth model (GGM) (14). This model characterizes the growth profile via two parameters: the growth rate parameter ( $r$ ) and the scaling of the growth rate parameter ( $p$ ). The model captures diverse epidemic profiles ranging from constant incidence ( $p = 0$ ), sub-exponential or polynomial growth ( $0 < p < 1$ ), and exponential growth ( $p = 1$ ) (14). The generation interval is assumed to follow a gamma distribution with a mean of 4.41 days and a standard deviation of 3.17 days (15, 16).

Next, to estimate the most recent estimate of  $R_t$ , we simulate the progression of incident cases from GGM, and apply the discretized probability distribution ( $\rho_i$ ) of the generation interval using the renewal equation (17-19) given by

$$R_{t_i} = \frac{I_i}{\sum_{j=0}^{t_i} (I_{t_i-j} + \alpha J_{t_i-j}) \rho_i}.$$

In the renewal equation we denote the local incidence at calendar time  $t_i$  by  $I_i$ , and the raw incidence of imported cases at calendar time  $t_i$  by  $J_i$ . The parameter  $0 \leq \alpha \leq 1$  quantifies the relative contribution of imported cases to the secondary disease transmission (20). The denominator represents the total number of cases that contribute to the incidence cases at time  $t_i$ . Next, we estimate  $R_t$  for 300 simulated curves assuming a Poisson error structure to derive the uncertainty bounds around the curve of  $R_t$  (21).

## **Results**

### ***Reconstructed incidence of COVID-19***

The reconstructed daily incidence curve of COVID-19 after the imputing the onset dates for the Korean cases is shown in Figure 1. Between January 20 and February 18, 2020 an average of 2 new cases were reported each day, whereas between February 19- 26, 2020, 153 new cases were reported each day on average.

### ***Effective reproduction number ( $R_t$ ) from daily case incidence***

Under the empirical reporting delay distribution from Korean cases with available dates of onset, the intrinsic growth rate ( $r$ ) was estimated at 0.6 (95% CI: 0.5, 0.7) and the scaling of growth parameter ( $p$ )

was estimated at 0.76 (95% CI: 0.73, 0.79), indicating sub-exponential growth dynamics of COVID-19 in Korea (Figure 2, Table 1). The mean reproduction number  $R_t$  was estimated at 1.5 (95% CI: 1.4, 1.6). Our estimates of  $R_t$  are not sensitive to the changes to the parameter that modulates the contribution of the imported cases to transmission ( $\alpha$ ).

| Parameters                       | Estimated values       |
|----------------------------------|------------------------|
| Reproduction number              | 1.5 (95% CI:1.4,1.6)   |
| Growth rate, $r$                 | 0.6 (95%CI:0.5,0.7)    |
| Scaling of growth parameter, $p$ | 0.76 (95%CI:0.73,0.79) |

Table 1: Mean estimates and the corresponding 95% confidence intervals for the effective reproduction number, growth rate and the scaling of growth parameter during the early growth phase as of February 26, 2020.

### ***Transmission clusters***

Spatial distribution of the Korean clusters is shown in Figure 3 and the characteristics of each cluster are presented in Table 1.

#### ***Shincheonji Church of Jesus cluster***

As of February 26, 2020, 597 (or 47%) of the country's 1261 confirmed cases of COVID-19 are linked to this cluster, according to the KCDC (4). This largest cluster is associated with Shincheonji Church of Jesus, with the first case (the 31<sup>st</sup> patient in the country) confirmed on Feb. 18. It is unclear how this case contracted the illness, as she does not present a recent history of travel or contact with another infected patient. However, this case attended Shincheonji Church of Jesus in Daegu four times before and after becoming a symptomatic case of COVID-19, and visited the hospital in Cheongdo after a car accident. According to the KCDC, the patient had contact with 166 people mostly at Shincheonji Church and the hospital in Cheongdo, who now placed themselves into self-quarantine. The Shincheonji church of Jesus has temporarily closed its facilities and halted the church activities as of February 18, 2020.

#### ***Pilgrimage tour to Israel related***

A total of 31 infected cases belonging to a group of 39 Catholic pilgrims who visited Israel between February 8, 2020 and February 16, 2020 were confirmed for COVID-19 (22). Amongst these, 11 individuals were diagnosed on February 17, 2020, while 20 others were confirmed positive between February 21-25, 2020 and quarantined immediately. Of the 31 infected pilgrims, 19 belong to the Euseong County, North Gyeongsang Province, while one patient, a tour guide belongs to Seoul. Health

authorities have traced 170 contacts from these 29 cases, raising concerns about the potential risk of secondary infections.

### ***Chungdo Daenam hospital cluster***

This cluster comprised of 114 local cases and five deaths is associated with Chungdo Daenam hospital, where South Korea's first coronavirus associated case fatality occurred. Of the 114 cases, 92 were confirmed on Feb 22, 2020 (4). A 63-year-old man who died of pneumonia at the hospital on Feb 19 was posthumously tested positive for COVID-19. On Feb 21, another patient at Daenam Hospital died from COVID-19, followed by another death on Feb 23. The confirmed cases were mainly from psychiatric ward and includes nine medical staffs. The exact route of the infection is not yet known.

### ***Cluster A***

This cluster is composed of one imported case and 12 local cases, and was identified with its first case (the 3rd patient in the country) confirmed on Jan 26, 2020. Its first case is suspected to be an imported case from Wuhan, China, transmitting SARS-CoV-2 to the 6<sup>th</sup> and 28<sup>th</sup> confirmed cases in Korea, which resulted in secondary cases. No further cases have been added in this cluster since February 21, 2020.

## **Discussion**

This is the first study to report estimates of the transmission potential of COVID-19 in Korea based on the trajectory of the epidemic, which was reconstructed by using the dates of onset of the first reported cases in Korea. The estimates of  $R$  clearly indicate sustained transmission of the novel coronavirus in Korea. Moreover, the imported cases contribute little to the secondary disease transmission in Korea, as majority of these cases occurred in the early phase of the epidemic, with the most recent imported case reported on February 9, 2020. These findings support the range of social distancing interventions that the Korean government put in place in order to bring the outbreak under control as soon as possible.

Our estimates of the reproduction number can be compared with earlier estimates reported for the epidemic in China and the outbreak that unfolded aboard the Diamond Princess cruise ship where the estimates of the  $R_t$  ranged from 2.1 to 3.9 (23-26). A study estimating  $R_t$  for China has reported estimates as high as 7.1 during the early epidemic growth phase (1). However, a recent study on Singapore's COVID-19 transmission dynamics reported lower estimates for  $R_t$  (1.1, 95% CI: 1.1, 1.3) as of February 19<sup>th</sup>, 2020, reflecting a significant impact of control interventions in Singapore (27). The estimates of the scaling of growth parameter ( $p$ ) in our study indicate sub-exponential growth dynamics of COVID-19 in Korea. This aligns well with the sub-exponential growth patterns of COVID-19 in Singapore and all Chinese provinces except Hubei (27, 28).

Since the first COVID-19 case was reported on January 20, 2020, the epidemic's trajectory showed a rapid upturn until February 18, 2020, when a super spreader (Case 31) was identified in the Shincheonji Church of Jesus in Daegu cluster. Since then, Korea's confirmed cases have risen tremendously. In fact, 80 percent of confirmed cases are linked to the two clusters of infections, i.e. Shincheonji Church of Jesus in Daegu and Chungdo Daenam hospital (29). Such superspreading events have been reported for the 2015 MERS outbreak in South Korea (30). Amplification of MERS in the hospital setting has been associated with diagnostic delays, which increase the window of opportunity for the generation of secondary cases (9). This underscores the need for rapid testing, case detection and active contact tracing to isolate infectious individuals.

Beyond Korea, substantial COVID-19 transmission has been reported in Singapore, Iran, Italy, Germany and aboard the Diamond cruise ship (31, 32). While the cluster A and the Chungdo Daenam hospital cluster in Korea seem to have stabilized, the other two clusters are likely to keep growing in the short term. Public health authorities are currently focused on containing the outbreak in the city of Daegu, the epicenter of the outbreak and North Gyeongsang Province where active contact tracing is being conducted. Nation-wide preventative measures are expected to reduce the community transmission and ultimately bring  $R_t$  below one.

## Conclusion

This is the first study to estimate the transmission potential of COVID-19 in Korea. Our current findings suggest sustained disease transmission in the region. Our estimates support the implementation of a wide array of social distancing measures to rapidly contain the outbreak in Korea.

## References

1. Mizumoto K, Kagaya K, Chowell G. Early epidemiological assessment of the transmission potential and virulence of 2019 Novel Coronavirus in Wuhan City: China, 2019-2020. medRxiv. 2020:2020.02.12.20022434.
2. Adler SE. Why Coronaviruses Hit Older Adults Hardest. AARP. 2020 February 5, 2020.
3. WHO. Coronavirus disease (COVID-2019) situation reports: World Health Organization; 2020 [Available from: <https://www.who.int/emergencies/diseases/novel-coronavirus-2019/situation-reports>].
4. The updates on COVID-19 in Korea as of 25 February [Internet]. 2020. Available from: <https://www.cdc.go.kr/board/board.es?mid=a30402000000&bid=0030>.
5. Ryall J. Coronavirus: Surge in South Korea virus cases linked to church 'super-spreader'. The Telegraph. 2020 Feb 20, 2020.
6. Kuhn A. Secretive Church Sect At The Center Of South Korea's Coronavirus Outbreak. npr.

2020 Fenraury 24,2020.

7. Bostock B. South Korea is testing 200,000 members of a doomsday church linked to more than 60% of its coronavirus cases. Business Insider. 2020 February 25, 2020.
8. News B. Coronavirus: South Korea declares highest alert as infections surge. BBC News. 2020 February 23, 2020.
9. Chowell G, Abdirizak F, Lee S, Lee J, Jung E, Nishiura H, et al. Transmission characteristics of MERS and SARS in the healthcare setting: a comparative study. BMC Medicine. 2015;13(1):210.
10. Kim C. As Covid-19 cases rise, South Korea raises virus threat level to its maximum. Vox. 2020 February 23, 2020.
11. Tariq A, Roosa K, Mizumoto K, Chowell G. Assessing reporting delays and the effective reproduction number: The Ebola epidemic in DRC, May 2018-January 2019. Epidemics. 2019;26:128-33.
12. Anderson RM, May RM. Infectious Diseases of Humans. Oxford, editor. Oxford Univeristy Press1991.
13. Nishiura H, Chowell G, Heesterbeek H, Wallinga J. The ideal reporting interval for an epidemic to objectively interpret the epidemiological time course. J R Soc Interface. 2010;7(43):297-307.
14. Viboud C, Simonsen L, Chowell G. A generalized-growth model to characterize the early ascending phase of infectious disease outbreaks. Epidemics. 2016;15:27-37.
15. Nishiura H, Linton NM, Akhmetzhanov AR. Serial interval of novel coronavirus (2019-nCoV) infections. medRxiv. 2020:2020.02.03.20019497.
16. You C, Deng Y, Hu W, Sun J, Lin Q, Zhou F, et al. Estimation of the Time-Varying Reproduction Number of COVID-19 Outbreak in China. medRxiv. 2020:2020.02.08.20021253.
17. Nishiura H, Chowell G. Early transmission dynamics of Ebola virus disease (EVD), West Africa, March to August 2014. Euro surveillance : bulletin Europeen sur les maladies transmissibles = European communicable disease bulletin. 2014;19(36).
18. H. Nishiura GC. The Effective Reproduction Number as a Prelude to Statistical Estimation of Time-Dependent Epidemic Trends. Springer D, editor2009. 103-12 p.
19. Paine S, Mercer GN, Kelly PM, Bandaranayake D, Baker MG, Huang QS, et al. Transmissibility of 2009 pandemic influenza A(H1N1) in New Zealand: effective reproduction number and influence of age, ethnicity and importations. Euro surveillance : bulletin Europeen sur les maladies transmissibles = European communicable disease bulletin. 2010;15(24).
20. Nishiura H, Roberts MG. Estimation of the reproduction number for 2009 pandemic influenza A(H1N1) in the presence of imported cases. Eurosurveillance. 2010;15(29):19622.
21. Chowell G. Fitting dynamic models to epidemic outbreaks with quantified uncertainty: A primer for parameter uncertainty, identifiability, and forecasts. Infectious Disease Modelling. 2017;2(3):379-98.
22. 29 S. Korean pilgrims to Israel infected with coronavirus: authorities. Yonhap News 2020 Feb 24, 2020.



23. Special Expert Group for Control of the Epidemic of Novel Coronavirus Pneumonia of the Chinese Preventive Medicine A. [An update on the epidemiological characteristics of novel coronavirus pneumonia COVID-19]. *Zhonghua liu xing bing xue za zhi = Zhonghua liuxingbingxue zazhi*. 2020;41(2):139-44.
24. Zhang S, Diao M, Yu W, Pei L, Lin Z, Chen D. Estimation of the reproductive number of Novel Coronavirus (COVID-19) and the probable outbreak size on the Diamond Princess cruise ship: A data-driven analysis. *International journal of infectious diseases : IJID : official publication of the International Society for Infectious Diseases*. 2020.
25. Lai A, Bergna A, Acciarri C, Galli M, Zehender G. Early Phylogenetic Estimate of the Effective Reproduction Number Of Sars-CoV-2. *Journal of medical virology*. 2020.
26. Zhou T, Liu Q, Yang Z, Liao J, Yang K, Bai W, et al. Preliminary prediction of the basic reproduction number of the Wuhan novel coronavirus 2019-nCoV. *J Evid Based Med*. 2020.
27. Tariq A, Lee Y, Roosa K, Blumberg S, Yan P, Ma S, et al. Real-time monitoring the transmission potential of COVID-19 in Singapore, February 2020. *medRxiv*. 2020:2020.02.21.20026435.
28. Roosa K, Lee Y, Luo R, Kirpich A, Rothenberg R, Hyman JM, et al. Real-time forecasts of the COVID-19 epidemic in China from February 5th to February 24th, 2020. *Infectious Disease Modelling*. 2020;5:256-63.
29. Reuters. The Korean clusters 2020 [Available from: <https://graphics.reuters.com/CHINA-HEALTH-SOUTHKOREA-CLUSTERS/0100B5G33SB/index.html>].
30. Cowling BJ, Park M, Fang VJ, Wu P, Leung GM, Wu JT. Preliminary epidemiological assessment of MERS-CoV outbreak in South Korea, May to June 2015. *Euro surveillance : bulletin europeen sur les maladies transmissibles = European communicable disease bulletin*. 2015;20(25):7-13.
31. Marcus I. Chronology: Germany and Covid 19 ('Coronavirus'). *The Berlin Spectator*. 2020 February 13, 2020.
32. Woods A. 44 new coronavirus cases reported on quarantined Diamond Princess cruise. *New York Post*. 2020 February 13, 2020.

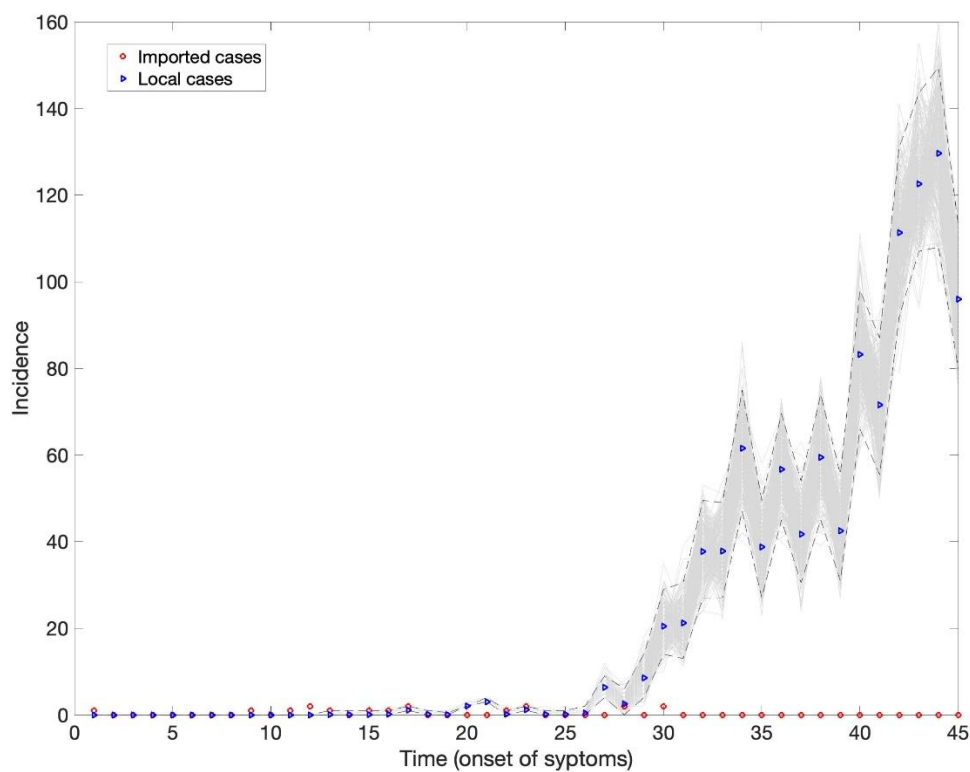

Figure 1: Reconstructed epidemic curve for the local Korean COVID-19 cases by the dates of onset. The blue triangles represent the local cases, red triangles represent the imported cases and the gray curves correspond to the uncertainty in the local cases because of missing onset dates.

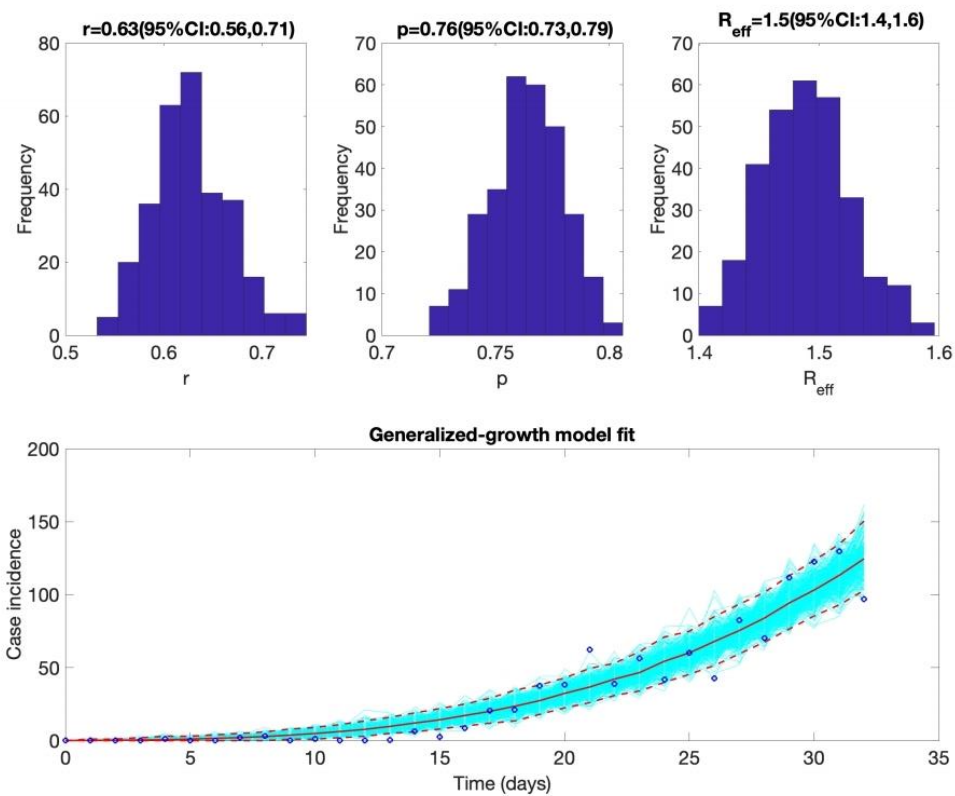

Figure 2: The mean reproduction number with 95% CI estimated by adjusting for the imported cases with  $\alpha=0.15$ . Estimates for growth rate ( $r$ ) and the scaling of the growth rate parameter ( $p$ ) are also provided. The plot at the bottom depicts the fit of the Generalized Growth Model to the Korean data assuming Poisson error structure as of February 26, 2020.

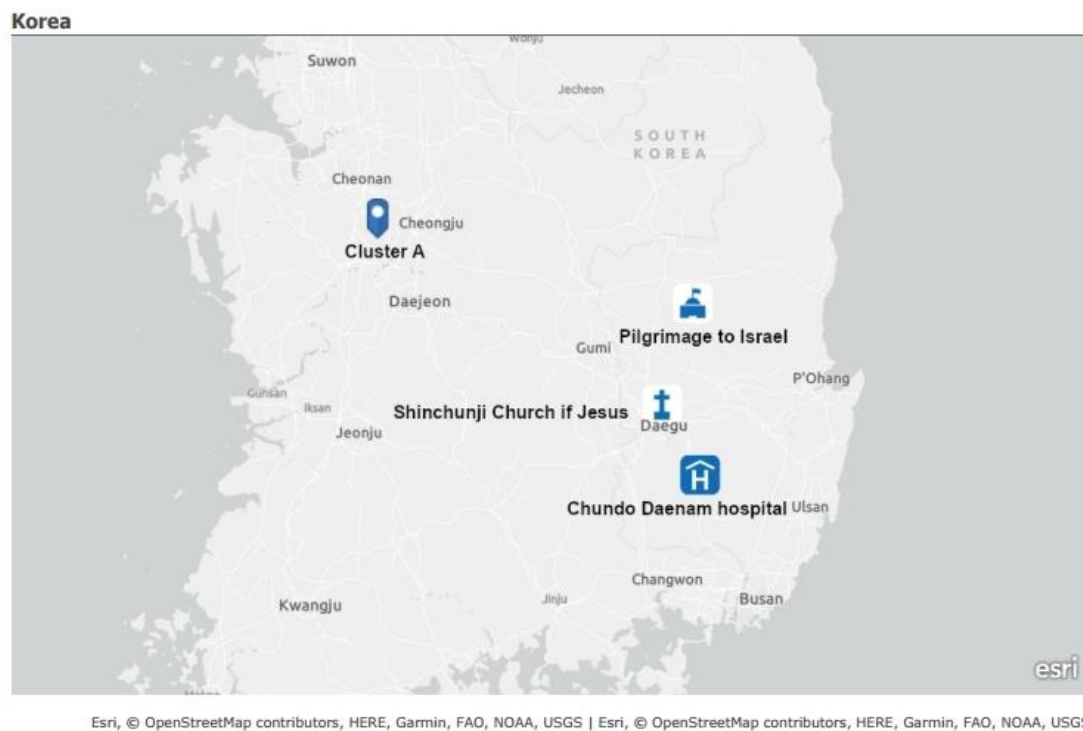

Figure 3: Map depicting the spatial distribution of the four largest clusters of COVID-19 in Korea as of February 26, 2020.
